# Supplementary material for: Foot, ankle, and leg problems in Australian primary care: consultation patterns, management practices and costs
Source: Research Square preprint supplement (doi:10.21203/rs.3.rs-1322389/v1), 2022-02-03
Supplement: Supplementary file 1 [file 61472d11dcf76d41b7c6d4f8.docx]

**Additional file:** ICPC2-Plus codes related to foot, ankle and lower leg conditions.

| ICPC-2 Plus code | Label | Category |
| --- | --- | --- |
| A29030 | Problem;foot/feet;diabetes | Non-specific foot/ankle/lower leg disorder |
| A31033 | Exam;foot/feet | Management |
| A66020 | Referral;podiatrist/chiropodist | Management |
| A67028 | Referral;foot clinic | Management |
| K07001 | Oedema;ankle/foot/feet | Venous / swelling |
| K07002 | Swollen;ankle | Venous / swelling |
| K07003 | Dropsy | Venous / swelling |
| K07004 | Swollen;foot/feet | Venous / swelling |
| K07005 | Swollen;ankle;non-traumatic | Venous / swelling |
| K07008 | Oedema;dependent | Venous / swelling |
| K07009 | Oedema;leg | Venous / swelling |
| K07010 | Swollen;leg | Venous / swelling |
| K07013 | Oedema;peripheral | Venous / swelling |
| K07014 | Oedema;ankle | Venous / swelling |
| K07014 | Oedema;ankles | Venous / swelling |
| K07015 | Oedema;feet | Venous / swelling |
| K07015 | Oedema;feet | Venous / swelling |
| K92001 | Disease;Buergers | Ischaemia |
| K92002 | Disease;Raynauds | Ischaemia |
| K92003 | Disease;peripheral vascular | Ischaemia |
| K92004 | Gangrene | Ischaemia |
| K92006 | Ischaemia;limb (gangrene) | Ischaemia |
| K92010 | Raynauds phenomenon | Ischaemia |
| K92016 | Vasospasm;peripheral | Ischaemia |
| K92017 | Claudication;intermittent | Ischaemia |
| K92031 | Disease;small vessel | Ischaemia |
| K95001 | Eczema;varicose | Venous / swelling |
| K95002 | Stasis;venous | Venous / swelling |
| K95004 | Insufficiency;venous | Venous / swelling |
| K95005 | Varicose veins;inflamed;leg | Venous / swelling |
| K95006 | Varicose veins;leg | Venous / swelling |
| K95007 | Dermatitis;stasis | Venous / swelling |
| K95008 | Rupture;varicose vein | Venous / swelling |
| L14005 | Pain;musculoskeletal;leg | Unspecified pain |
| L14006 | Pain;leg | Unspecified pain |
| L14008 | Cramp(s);nocturnal/night | Cramps |
| L14010 | Sympt/complaint;leg | Non-specific foot/ankle/lower leg disorder |
| L14014 | Cramp(s);leg | Cramps |
| L14016 | Cramp(s);calf | Cramps |
| L16001 | Pain;ankle | Unspecified pain |
| L16002 | Pain;musculoskeletal;ankle | Unspecified pain |
| L16004 | Sympt/complaint;ankle | Non-specific foot/ankle/lower leg disorder |
| L16005 | Unstable;ankle | Musculoskeletal |
| L16006 | Stiffness;ankle | Non-specific foot/ankle/lower leg disorder |
| L17001 | Pain;foot/feet | Unspecified pain |
| L17002 | Pain;musculoskeletal;foot/feet | Unspecified pain |
| L17003 | Pain;toe(s) | Unspecified pain |
| L17004 | Pain;musculoskeletal;toe(s) | Unspecified pain |
| L17007 | Sympt/complaint;foot/feet | Non-specific foot/ankle/lower leg disorder |
| L17008 | Sympt/complaint;toe(s) | Non-specific foot/ankle/lower leg disorder |
| L17011 | Metatarsalgia | Non-specific foot/ankle/lower leg disorder |
| L17012 | Pain;heel | Unspecified pain |
| L17013 | Cramp(s);foot/feet | Cramps |
| L17014 | Stiffness;toe(s) | Non-specific foot/ankle/lower leg disorder |
| L17015 | Swelling;toe(s) | Non-specific foot/ankle/lower leg disorder |
| L40003 | Arthroscopy;ankle | Management |
| L40005 | Arthroscopy;foot/feet | Management |
| L41026 | X-ray;foot/feet | Management |
| L41027 | X-ray;ankle | Management |
| L41037 | X-ray;toe(s) | Management |
| L41038 | X-ray;heel | Management |
| L41039 | X-ray;tibia/fibula | Management |
| L41066 | X-ray;leg lower | Management |
| L41068 | X-ray;metatarsal | Management |
| L41071 | Ultrasound;ankle | Management |
| L41076 | Ultrasound;foot/toe(s) | Management |
| L41094 | CT scan;foot/feet | Management |
| L41095 | CT scan;ankle | Management |
| L41114 | MRI;ankle | Management |
| L41115 | MRI;foot/feet | Management |
| L45006 | Advice/education;footwear | Management |
| L52009 | Amputation;non-traumatic | Amputation |
| L52012 | Amputation;below knee | Amputation |
| L52013 | Amputation;above knee | Amputation |
| L52016 | Amputation;foot | Amputation |
| L52019 | Amputation;toe(s) | Amputation |
| L54002 | Adjusting;orthopaedic shoes | Management |
| L54023 | Fitting (of);brace;leg | Management |
| L54025 | Fitting (of);orthopaedic shoe | Management |
| L54029 | Reconstruction;ankle | Management |
| L54032 | Reconstruction;foot/feet | Management |
| L54032 | Reconstruction;foot/feet | Management |
| L54039 | Adjusting;brace;leg | Management |
| L54051 | Treat;fract/disloc;ankle | Management |
| L54058 | Treat;fract/disloc;fibula | Management |
| L54066 | Treat;fract/disloc;metatarsal | Management |
| L54082 | Treat;fract/disloc;tibia | Management |
| L54083 | Treat;fract/disloc;toe(s) | Management |
| L54092 | Replace;joint;ankle | Management |
| L73001 | Fracture;fibula | Injury |
| L73002 | Fracture;ankle | Injury |
| L73003 | Fracture;Potts | Injury |
| L73004 | Fracture;tibia | Injury |
| L73005 | Fracture;malleolus;medial | Injury |
| L73006 | Fracture;malleolus;lateral | Injury |
| L73007 | Fracture;malleolus | Injury |
| L73009 | Fracture;tibia and fibula | Injury |
| L74002 | Fracture;foot/feet | Injury |
| L74005 | Fracture;metatarsal(s) | Injury |
| L74007 | Fracture;tarsal(s) | Injury |
| L74010 | Fracture;toe(s) | Injury |
| L74012 | Fracture;calcaneus | Injury |
| L77001 | Sprain;ankle | Injury |
| L77002 | Strain;ankle | Injury |
| L79014 | Sprain;foot/feet | Injury |
| L79018 | Strain;foot/feet | Injury |
| L79036 | Shin splints | Musculoskeletal |
| L80004 | Dislocation;foot/feet | Injury |
| L80012 | Dislocation;ankle | Injury |
| L80023 | Dislocation;toe(s) | Injury |
| L81019 | Injury;toe | Injury |
| L81022 | Injury;ankle | Injury |
| L81025 | Injury;foot/feet | Injury |
| L81030 | Haemarthrosis;ankle | Injury |
| L82003 | Clubfoot | Congenital |
| L82005 | Bowlegged;congenital | Congenital |
| L82008 | Knock-knee;congenital | Congenital |
| L82009 | Pigeon toed | Congenital |
| L82014 | Talipes | Congenital |
| L82016 | Feet turned in | Congenital |
| L82017 | Genu valgum;congenital | Congenital |
| L82025 | Deformity;foot;congenital | Congenital |
| L82029 | Hemimelia | Congenital |
| L82032 | Feet turned out | Congenital |
| L82033 | Deformity;ankle;congenital | Congenital |
| L87017 | Calcaneal spur | Musculoskeletal |
| L87024 | Fasciitis;plantar | Musculoskeletal |
| L87029 | Bursitis;heel | Musculoskeletal |
| L91016 | Arthritis;ankle | Musculoskeletal |
| L91017 | Osteoarthritis;ankle | Musculoskeletal |
| L91018 | Arthritis;foot/feet | Musculoskeletal |
| L91019 | Osteoarthritis;foot/feet | Musculoskeletal |
| L91021 | Osteoarthritis;toe(s) | Musculoskeletal |
| L91023 | Arthritis;toe(s) | Musculoskeletal |
| L94014 | Severs disease | Musculoskeletal |
| L98001 | Bunion | Musculoskeletal |
| L98002 | Clubfoot;acquired | Musculoskeletal |
| L98003 | Bowlegged | Congenital |
| L98004 | Pes planus (flat foot) | Congenital |
| L98006 | Hammer toe | Musculoskeletal |
| L98007 | Hallux;valgus | Musculoskeletal |
| L98008 | Hallux;rigidus | Musculoskeletal |
| L98011 | Pes cavus (claw foot) | Congenital |
| L98013 | Genu valgum;knock knee | Congenital |
| L98015 | Deformity;limb;acquired | Musculoskeletal |
| L98017 | Deformity;foot;acquired | Musculoskeletal |
| L98018 | Deformity;ankle;acquired | Musculoskeletal |
| L99105 | Arthropathy;Charcot | Neuropathy |
| N04001 | Restless legs syndrome | Neuropathy |
| N05001 | Burning;sensation;extremities | Neuropathy |
| N05005 | Tingling;feet/toes | Neuropathy |
| N05006 | Paraesthesia | Neuropathy |
| N06022 | Numbness;toe(s) | Neuropathy |
| N06023 | Numbness;foot | Neuropathy |
| N06024 | Numbness;leg | Neuropathy |
| N18002 | Footdrop | Neuropathy |
| N94012 | Neuropathy; diabetic | Neuropathy |
| N94016 | Mononeuritis;legs | Neuropathy |
| N94018 | Neuritis;peripheral | Neuropathy |
| S09005 | Infection;toe(s) | Infection |
| S09010 | Abscess;toe(s) | Infection |
| S09011 | Cellulitis;toe(s) | Infection |
| S11019 | Infection;ingrown toenail | Infection |
| S20001 | Corns | Dermatological |
| S20002 | Callosities | Dermatological |
| S21021 | Sympt/complaint;skin;heel | Dermatological |
| S46002 | Consult;podiatrist | Management |
| S52022 | Resection;ingrown toenail(s) | Management |
| S52026 | Removal;toenail(s) | Management |
| S59002 | Podiatry | Management |
| S74001 | Athletes foot | Infection |
| S74004 | Infection;fungus;nail(s) | Infection |
| S74005 | Infection;fungus;skin | Infection |
| S74006 | Mycosis;skin | Infection |
| S74009 | Tinea | Infection |
| S74015 | Onychomycosis | Infection |
| S74018 | Tinea pedis | Infection |
| S74025 | Mycetoma | Infection |
| S76009 | Pitted keratolysis | Infection |
| S76015 | Cellulitis;leg | Infection |
| S76016 | Cellulitis;foot/feet | Infection |
| S94002 | Ingrown;toenail(s) | Dermatological |
| S97004 | Ulcer;varicose | Ulceration |
| S97008 | Ulcer;leg | Ulceration |
| S97012 | Ulcer;foot | Ulceration |
| S97013 | Ulcer;diabetic | Ulceration |
| S97014 | Ulcer;venous | Ulceration |
| S97016 | Ulcer;toe(s) | Ulceration |
